# Supplementary material for: The use of Multi-compartment Compliance Aids (MCAs) in Pharmacies in England and North Wales
Source: Preprints.org preprint supplement (doi:10.20944/preprints202007.0541.v1), 2020-07-23
Supplement: Supplementary file 1 [file supplementary]

## Sheet: Locations A
	polypharmacy - 4 or more different drugs
	Painkillers - green				Red - major interactions		Trays
	no polypharmacy - blue
	Tray 1	Date	Age	Sex	number of drugs	Externals	Drugs	Interactions (BNF/ Drugs.com/ Martindale)	Targeted group
	1	10518	82	male	6	zerobase, betamethasone 0.1% cream, lactulose sln, Oilatum	simvastatin 20, tamsulosin MR 400MCG, trazodone 50, clonazepam 2, baclofen 10, folic acid 5	moderate	Depression
	2	10518	80	male	7	Humalog Mix50 100units/ml susp	Ferrous fumarate 210, furosemide 40, aspirin gr 75, atorvastatin 40, bisoprolol 2.5, quinine sulfate 300, isorbide 10	moderate	Cardiov/diabetes
	3	11518	63	male	8	GLUCORX Nexus testing strips, paracetamol 500	aspirin disp 75, ferrous fumarate210, gliclazide80, indapamide mr 1.5, metformin500, moxonidine200, simvastatin20, losartan 100	moderate	Cardiov/diabetes
	4	11518	86	female	6	laxido, glyceryl trin 400 subl, shortec5,GLUCORX Nexus testing strips, senna7.5	furosemide20, aspirin disp75, atorvastatin20, bisoprolol 1.25, Elantan LA50, Gliclazide80	moderate	Cardiov/diabetes
	5	11518	81	male	9	sharpsafe disp, liraglutide6mg/ml	ramipril10, metformin500, mirtazapine30,aspirin75 disp,atorvastatin40,bisoprolol2.5,monomil xl60, amlodipine5, clopidogrel75	moderate	Cardiov/diabetes
	6	11518	75	male	5	alendronic acid70, Zapain30/500	colecal400+ca carbonate1.25, folic acid5, lansoprazole25,pregabalin50, levothyroxine25	moderate	Hypothyroidism/ prostate cancer?
	7	11518	79	male	14	peptac liquid, paracetamol500	see tray	Spirinolactone-losartan/fluoxetine-clopidogrel	cardiovascular
	8	11518	89	female	6	lansoprazole30, braltus 10,	metformin500, uniphylin cont200, angitil sr 120, atorvastatin20, calcichew-D3 forte, carbocisteine 375	moderate	cardiovascular/ respiratory/ diabetes
	9	11518	88	male	5	none	aspirin75 disp, atenolol25, levothyroxine25,levothyroxine50, simvastatin20	minor	cardiovascular
	10	11518	46	female	6	omeprazole20, cocareldopa12.5/50	apixaban5, bisoprolol5, colecalciferol 800u, isosorbide mono mr 25, pravastatin10, mirtazapine15	moderate	cardiovascular/ parkinson
	11	21518	80	female	8	none	sertraline100, sertraline50, topiramate100, aripiprazole5, lansoprazole15, levetiracetam750, propranolol40, lacosamide100	topiramate-aripiprazole	epilepsy /psycosis
	12	21518	68	male	6	zapain 30/500, folic acid5, methotrexate 2.5	isosorbide mono mr25, atorvastatin20, bisoprolol2.5, EvacalD3 1500/400, losartan100, ranitidine150	moderate	cardiovascular/auto-immune disease
	13	22618	79	female	6	folic acid5, methotrexate 2.5, zapain 30/500	isosorbide mono mr25, atorvastatin20, bisoprolol2.5, EvacalD3 1500/400, losartan100, ranitidine150	moderate	cardiovascular/auto-immune disease
	14	22618	88	female	6	glyceryl trinitrate 400 sub spray	eplerenone25, ramipril10caps, aspirin75 disp tab, atorvastatin 20, carbamazepine 100, carvedilol25	moderate	cardiovascular
	15	22618	73	male	6	none	Gliclazide80, isosorbide 20, atorvastatin40, bisoprolol2.5, ramipril1.25, ranitide150	none	Cardiov/diabetes
	16	24618	38	female	5	none	FultiumD3 800caps, gabapentin100, lanzoprazole300, paracetamol500,sertraline100	moderate	peripheral nerve pain
	17	24618	70	female	12	AdcalD3, ceterizine10	see tray	moderate	cardiovascular/ parkinson/breast cancer
	18	24618	77	male	9	none	amlodipine5, apixaban5, atorvastatin40, bisoprolol1.25,carbocisteine375,EvacalD3,furosemide40,lanzoprazole30, ramipril10	moderate	cardiovascular
	19	24618	94	female	8	nicorandil 10 (one twice daily)	aspirin75 disp, atorvastatin80, bisoprolol1.25,clopidogrel75, gliclazide80, isosorbide20,ramipril2.5,ranitidine150	moderate	Cardiov/diabetes
	20	24618	81	female	5	none	AdcalD3, aspirin75 disp, lanzoprazole15, senna7.5, sertraline50	moderate	depression
	21	24618	83	male	12	methotrexate2.5	see tray	methotrexate- lansoprazole	Alzheimer/ cardiovascular/ autoimmune disease
	22	24618	60	male	6	none	amlodipine10, atorvastatin10, citalopram20, gabapentin100,metformin500, ramipril10	moderate	cardiovascular/ diabetes
	23	24618	57	female	6	none	amitryptiline10, atorvastatin 20, colecalciferol (vitD3)800u, omeprazole20, paracetamol500,sertraline50	amitriptyline-sertraline	Depression
	24	24618	71	female	5	none	aspirin gr 75, furosemide20, lanzoprazole30, nifedipress mr 20, ramipril5	moderate	cardiovascular/ blood pressure
	25	29618	89	female	9	Fenbid forte 10%	see tray	moderate	cardiovascular/ blood pressure/ gout/ alzheimer/ auto-immune disease
	26	29618	64	male	5	none	aspirin 75 disp, bisoprolol 2.5, lercanidipine20, losartan100,simvastatin40	moderate	cardiovascular/ blood pressure
	27	29618	80	female	8	nicorandil 10 (3 to be taken twice a day)	see tray	moderate	alzheimer/ cardiovascular/blood pressure
	28	2718	81	male	11	dorzolamide/timolol eye drops, glyceryl trinit sub spray, nicorandil20 (BD), bimatoprost100 eye drops	see tray	aspirin-nicorandil	cardiovascular/ diabetes
	29	2718	87	female	3	lactulose, mirtazapine orodispersible15	risperidone0.5, ranitidine150, evacalD3	moderate	schizophrenia/ depression
	30	2718	72	male	6	bethametasone0.1%, oilatum,zerobase,	simvastatin20, tamsulosin mr 400, trazodone50, clonazepam2, baclofen10, folic acid5	moderate	depression, prostate hyperplasia
	31	3718	72	female	6	paracetamol500	aspirin gr 75,atorvastatin 40, lanzoprazole30, metformin mr 500, tildiem retard90, levothyroxine 50	moderate	blood pressure/ diabetes
	32	3718	72	male	5	Co-codamol30/500, humalog mix25 100u/ml	ramipril10,citalopram10,memantine20, metformin500, atorvastatin40	moderate	alzheimer, diabetes, depression, cardiovascular
	33	3718	81	male	14	salbutamol100, peptac, paracetamol500,	see tray	salbutamol- carvedilol/ spironolactone-losartan/ Fluoxetine -clopidogrel	cardiovascular/ diabetes
	34	3718	46	female	8	none	see tray	topiramate -ARIPiprazole	epilepsy, psychosis, depression
	35	9718	82	male	4	none	amlodipine10,atorvastatin10, metformin500,ramipril1.25	moderate	cardiovascular/ diabetes
	36	9718	25	female	7	none	see tray	moderate	epilepsy, psychosis
	37	4918	71	male	5	none	aripiprazole 30, olanzapine 2.5, pantoprazole 20 gr, sertraline 100, sertraline 50	moderate	psychosis
	38	4918	79	female	6	none	amytriptiline 10, metformin 500, ferrous fumarate 210, simvastatin 40, omeprazole 20, gabapentin 100	moderate	advanced diabetes
	39	4918	83	female	7	none	sertraline50, simvastatin40, aspirin 75 disp, colecalciferol400, folic acid 5, furosemide20, ramipril 1.25	moderate	cardiovascular
	40	4918	84	female	4	quinine sulfate300 (1N), Hylo-Forte0.2%, co-codamol 15/500	candesartan4, doxazosin2, folic acid5, furosemide20	moderate	blood pressure
	41	10918	77	female	6	Zapain 30/500	Ramipril 1.25, furosemide 20, metformin MR 1g, Atorvastatin 10, Zopiclone 7.5, duloxetine 60 gr	moderate	cardiovascular/ diabetes
	42	20918	71	male	10	AdcalD3 (twice daily), alendronic acid70 (one weekly), nicorandil (1M+1N)	see tray	hydrocortisone-nicorandil	cardiovascular
	43	20918	80	female	3	none	apixaban5, atorvastatin10, bisoprolol1.25	none	cardiovascular
	44	20918	79	female	5	alfacalcidol250 (1 caps 3x/week)	doxazosin4, felodipine10 mr, lansoprazole30 gr, simvastatin20, telmisartan40	moderate	blood pressure
	45	20918	50	male	7	diazepam5 (1N), diazepam 10 (1+1+1N), sodium valproate200 gr (2, 4x a day)	atorvastatin20, longtec20, citalopram20, longtec5, gabapentin300, hyoscine butyl10, omeprazole20	omeprazole-citalopram/diazepam-oxycodone	peripheral nerve pain, epilepsy
	46	20918	23	male	4	zolmitriptan2.5	methylphenidate5, sertraline50, methylphnidate20, sertraline100, aripiprazole10, ranitidine150	sertraline-zolmitriptan	ADHD
	47	26918	70	male	13	Salbutamol100, peptac, QVAR, Glyceril trinit, co-dydramol 10/500, anoro ellipta 55/22, carbocisteine 250mg/ml	see tray	moderate	diabetes, cardiovascular, respiratory, epilepsy
	48	11018	86	male	8	Enalapril 2.5 tablets (1 BD)	Rivaroxaban20, clopidogrel75, cyclizine50, lanzoprazole30, zopiclone3.75, carvedilol6.25, furosemide40, ferrous sulfate200	clopidogrel rivaroxaban	cardiovascular
	49	111018	83	male	8	Sodium valproate 200 GR (3 BD)	amlodipine5, aspirin 75 disp, bisoprolol 5, ramipril 10, rosuvastatin 20, tamsulosin 100, thiamine 100, vitamin B strong tablets	moderate	cardiovascular
	50	111018	43	female	4	no externals	amitryptiline 50, lansoprazole 15 gr caps, naproxen 500, pregabalin 300	moderate	peripheral nerve pain
	55	171018	69	male	10	clonazepam500, baclofen5mg/5ml, clenil modulite 100, hypromellose0.3%, ibuprofen10%gel, salbutamol100, conotrane cream, paracetamol 500 soluble, proshield plus skin protective, morphine 10 mr caps (2 every 12h), morphine 30 mr caps (1 BD), morphine sulphate 10mg/5ml, macrogol (1 sachet/day)	see tray	moderate	multiple: cardiovascular, bowell inflammatory dis, Parkinson
	56	171018	46	female	7	meptazinol 200 tabs (1 4x/day)	lansprazole 15, levothyroxine100, levothyroxine25, naproxen500, venlafaxine mr 225, venlafaxine 75, zopiclone 7.5	moderate	depression, underactive thyroide, pain
	57	171018	70	female	9	no externals	allopurinol300, amlodipine5, atenolol25, atorvastatin20, loperamide2, mesalazine gr 800 gr, omeparzole 20, ramipril 10, metformin 500	allopurinol- ramipril	cardiovascular, diabetes,bowell inflammatory dis
	51	191018	99	female	6	clenil modulite 100 (2p BD), salbutamol 100 (2p as needed)	aspirin75 disp, celiprolol200, dosulepin25, omeprazole40 gr tabs, simvastatin40, betahistine16	moderate	cardiovascular, vertigo
	52	191018	83	female	5	hypromellose0.3, latanoprost50, co-codamol8/500	pregabalin75, clopidogrel75, levothyroxine100, ferrous fumarate210,simvastatin20	moderate	cardiovascular, pain, underactive thyroid
	53	191018	61	male	4	no externals	adalat LA60, FultiumD3 800, atorvastatin 40, clopidogrel75	moderate	cardiovascular
	54	241018	76	male	6	no externals	amlodipine10, atenolol25,atorvastatin10,clopidogrel75, lanzoprazole30, metformin500	moderate	cardiovascular/ diabetes
	58	311018	31	female	7	no externals	concerta xl 18, concerta xl 36, quetiapine 100, sertraline 100, nifedipine100, duloxetine30 gr caps, duloxetine 60 gr caps	sertraline- DULoxetine	ADHD
	59	151118	26	female	6	no externals	folic acid5, fluoxetine40, mebeverine135, montekulast10, colecalciferol800unit	no interactions	ashtma, intestinal cramps, vitD deficiency, depression
					6.91525
					2.51967

## Sheet: Care Homes location B
		Patient	Date	Age	Sex	number of drugs	Externals	Drugs (M/L/A/E)	Interactions (BNF/ Drugs.com/ Martindale)	Targeted group	Adverse reactions	Clinical medication review
		16	25/01/2019	94	male	4	airflusal forspiro 50(1puff BD), edoxaban30 (1D), paracetamol500	omeprazole10 (1D), amlodipine5 (1D), isosorbide mono mr40 (1D), tamsulosin mr400 (1D)	minor	cardiovascular, prostate hyperplasia, respiratory
		Patient	Date	Age	Sex	number of drugs	Externals	Drugs (M/L/A/E)	Interactions (BNF/ Drugs.com/ Martindale)	Targeted group	Adverse reactions	Clinical medication review
		17	25/01/2019	62	female	2	none	amisulpride50 (1D), Adcal-d3 750/200 (2D)	no interactions	schizophrenic disorder
		Patient	Date	Age	Sex	number of drugs	Externals	Drugs (M/L/A/E)	Interactions (BNF/ Drugs.com/ Martindale)	Targeted group	Adverse reactions	Clinical medication review
		18	29/01/2019	92	female	5	none	clopidogrel75 (1D), furosemide40 (1M), lercanidipine10 (1D),perindopril8 (1D), lansoprazole15 (1D)	moderate	cardiovascular
		Patient	Date	Age	Sex	number of drugs	Externals	Drugs (M/L/A/E)	Interactions (BNF/ Drugs.com/ Martindale)	Targeted group	Adverse reactions	Clinical medication review
		Location B – North Wales, Locations A and C – England

## Sheet: Location B
	Patient	Date	Age	Sex	number of drugs	Externals	Drugs (M/L/A/E)	Interactions (BNF/ Drugs.com/ Martindale)	Targeted group	Adverse reactions	Clinical medication review
	1	2018-05-12	73	female	5	none	Bendroflumethiazide 2.5 (1M), Fultium-D3 (1M), Memantine 20 (1E), simvastatin20 (1E), amlodipine10 (1M)	amLODIPine simvastatin	Cardiovascular, Alzheimer's
	1	2019-05-01	73	female	3	none	Bendroflumethiazide 2.5 (1M), Fultium-D3 (1M), Memantine 20 (1E)	moderate	Cardiovascular, Alzheimer's
	1	2019-05-02	73	female	3	none	Bendroflumethiazide 2.5 (1M), Fultium-D3 (1M), Memantine 20 (1E)
	Patient	Date	Age	Sex	number of drugs	Externals	Drugs (M/L/A/E)	Interactions (BNF/ Drugs.com/ Martindale)	Targeted group	Adverse reactions	Clinical medication review
	2	2019-09-01		male	4	none	Bisoprolol 3.75 (1M+1L), cyanocobalamin 50 (1M+1A), furosemide 40 (1M+1L), isosorbide mono 40 (1M)	moderate	Cardiovascular
	Patient	Date	Age	Sex	number of drugs	Externals	Drugs (M/L/A/E	Interactions (BNF/ Drugs.com/ Martindale)	Targeted group	Adverse reactions	Clinical medication review
	3	14/1/2019	51	female	5	Epilim Chrono 500 (3E)	Ferrous fumarate 210 (1BD), Lamictal 100 (1BD), mebeverine 135(TDS before food), pyridoxine 50 (1OD), sertraline 50 (1BD)	Valproate-- lamotrigine (monitor rash)	Epilepsy/ bipolar disorder/ anemia
	3	2019-12-03	51	female	5	Epilim Chrono 500 (3E)	Ferrous fumarate 210 (1BD- M and E), Lamictal 100 (1BD, M, E), mebeverine 135(TDS before food, M, L,A), pyridoxine 50 (1OD, M), sertraline 50 (1BD-M, E)	Valproate-- lamotrigine (monitor rash)	Epilepsy/ bipolar disorder/ anemia
	3	2019-05-04	51	female	5	Epilim Chrono 500 (3E)	Ferrous fumarate 210 (1BD- M and E), Lamictal 100 (1BD, M, E), mebeverine 135(TDS before food, M, L,A), pyridoxine 50 (1OD, M), sertraline 50 (1BD-M, E)	Valproate-- lamotrigine (monitor rash)	Epilepsy/ bipolar disorder/ anemia
	Patient	Date	Age	Sex	number of drugs	Externals	Drugs (M/L/A/E	Interactions (BNF/ Drugs.com/ Martindale)	Targeted group	Adverse reactions	Clinical medication review
	4	17/1/2019	79	male	3	none	Bisoprolol 5 (1M), linagliptin 5 (1M), metformin 500 (1M)	no interactions	cardiovascular/ diabetes
	4	17/2/2019	79	male	3	peptac liquid, gaviscon advance mint chewable tablets	Bisoprolol 5 (1M), linagliptin 5 (1M), metformin 500 (1M)	no interactions	cardiovascular/ diabetes
	Patient	Date	Age	Sex	number of drugs	Externals	Drugs (M/L/A/E	Interactions (BNF/ Drugs.com/ Martindale)	Targeted group	Adverse reactions	Clinical medication review
	5	18/01/2019	71	male	3	Zapain 30/500	atorvastatin 40 (1M), clopidogrel 75 (1M), peridonpril 8 (1M)	moderate	Cardiovascular
	5	2019-05-04	71	male	3	Zacin 0.025% cream	atorvastatin 40 (1M), clopidogrel 75 (1M), peridonpril 8 (1M)	moderate	Cardiovascular
	Patient	Date	Age	Sex	number of drugs	Externals	Drugs (M/L/A/E	Interactions (BNF/ Drugs.com/ Martindale)	Targeted group	Adverse reactions	Clinical medication review
	6	18/01/2019	55	female	5	Fencino 12, sevredol 10,	amytriptyline10+25 (2E each), cyclizine 50 (1M+1L+1A), gabapentin 600 tabs (1M+1L+1A), gabapentin 300 caps (1M+1A), omeprazole 10 (1M), sertraline 100+50 (1M each)	amitriptyline fentaNYL/ fentaNYL sertraline/ amytriptyline sertraline/ fentanyl morphine/	depression/ chronic neuropatic pain
	Patient	Date	Age	Sex	number of drugs	Externals	Drugs (M/L/A/E	Interactions (BNF/ Drugs.com/ Martindale)	Targeted group	Adverse reactions	Clinical medication review
	7	18/01/2019	86	female	3	Alzest 4.6/24h	cyanocobalamin50 (1M), folic acid5 (1M), sertraline 50 (1M)	moderate	depression, lack of vitamin B12, Alzheimer's
	7	17/02/2019	86	female	3	Alzest 4.6/24h	cyanocobalamin50 (1M), folic acid5 (1M), sertraline 50 (1M)	moderate	depression, lack of vitamin B12, Alzheimer's
	Patient	Date	Age	Sex	number of drugs	Externals	Drugs (M/L/A/E	Interactions (BNF/ Drugs.com/ Martindale)	Targeted group	Adverse reactions	Clinical medication review
	8	21/01/2019	49	male	6	no externals	allopurinol 100 (1M), promethazine 25 (1-2 E), fultium D3 600u (1M), pregabalin 150 (1M+1A), propranolol 40 (1M+1L+1A), sertraline 100 (2M)	moderate	depression/ anxiety, hypertension, gout
	8	2019-02-02	49	male	6	no externals	allopurinol 100 (1M), promethazine 25 (1-2 E), fultium D3 600u (1M), pregabalin 300 (1M+1A), propranolol 40 (1M+1L+1A), sertraline 100 (2M)
	Patient	64	Age	Sex	number of drugs	Externals	Drugs (M/L/A/E	Interactions (BNF/ Drugs.com/ Martindale)	Targeted group	Adverse reactions	Clinical medication review
	9	21/01/2019	54	female	7	no externals	aripiprazole15 (2M)+ depakote 500 (1M+1L+1E)+metformin 500(1M+1A)+kemadrin5(1/2M+1/2E)+zopiclone 7.5 (1E)+loratine 10 (1E)+ januvia 100 (1M)	moderate	mania, epilepsy, diabetes
	9	24/2/19	54	female	7	aveeno body wash, aveeno skin relief,salbutamol100 inhaler (1-2p 4x)
	Patient	Date	Age	Sex	number of drugs	Externals	Drugs (M/L/A/E	Interactions (BNF/ Drugs.com/ Martindale)	Targeted group	Adverse reactions	Clinical medication review
recheck	10	25/01/2019	74	male	6	spironolactone25 (1D), zopiclone 3.75 (1E)	Simvastatin20 (1E), montekulast10 (1E), citalopram20 (1M), lansoprazole30 (1M), ?, ?	lansoprazole citalopram	depression, respiratory, cardiovascular
	Patient	Date	Age	Sex	number of drugs	Externals	Drugs (M/L/A/E	Interactions (BNF/ Drugs.com/ Martindale)	Targeted group	Adverse reactions	Clinical medication review
recheck	11	25/01/2019	37	male	4	none	depakote500 (1M+2E), metformin500 (TDS)+ rivaroxaban20 (1D), trazodone150 (2E)	moderate	bipolar disease, diabetes, thrombosis
	Patient	Date	Age	Sex	number of drugs	Externals	Drugs (M/L/A/E	Interactions (BNF/ Drugs.com/ Martindale)	Targeted group	Adverse reactions	Clinical medication review
	12	28/1/19	64	male	3	salbutamol100, clenil modulite200, duaklir340, warfarin1, 3,5	simvastatin20 (1E) sinemet 12.5/50 (TDS), sinemet plus 25/100 (TDS),	moderate	Parkinson, thrombosis
	12	24/2/19	64	male	3	salbutamol100, clenil modulite200, duaklir340, warfarin1, 3,5	simvastatin20 (1E) sinemet 12.5/50 (TDS), sinemet plus 25/100 (TDS),	moderate	Parkinson, thrombosis
	12	23/3/19	64	male	3	salbutamol100, clenil modulite200, duaklir340, warfarin1, 3,5	simvastatin20 (1E) sinemet 12.5/50 (TDS), sinemet plus 25/100 (TDS),	moderate	Parkinson, thrombosis
	12	13/4/2019	64	male	3	salbutamol100, clenil modulite200, duaklir340, warfarin1, 3,5	simvastatin20 (1E) sinemet 12.5/50 (TDS), sinemet plus 25/100 (TDS),	moderate	Parkinson, thrombosis
	Patient	Date	Age	Sex	number of drugs	Externals	Drugs (M/L/A/E	Interactions (BNF/ Drugs.com/ Martindale)	Targeted group	Adverse reactions	Clinical medication review
	13	28/1/19	64	male	6	none	amlodipine5 (1d), mirtazapine30 (1E), ramipril5 (1d), sinemet plus 25/100 (TDS), zopiclone7.5 (1E), venlalic XL75 (1M)	venlafaxine mirtazapine,	Parkinson, cardiovascular, depression
	13	24/2/2019	64	male	6	none	amlodipine5 (1d), mirtazapine30 (1E), ramipril5 (1d), sinemet plus 25/100 (TDS), zopiclone7.5 (1E), venlalic XL75 (1M)	venlafaxine mirtazapine,	Parkinson, cardiovascular, depression
	13	23/3/19	64	male	6	none	amlodipine5 (1d), mirtazapine30 (1E), ramipril5 (1d), sinemet plus 25/100 (QDS), zopiclone7.5 (1E), venlalic XL75 (1M)	venlafaxine mirtazapine,	Parkinson, cardiovascular, depression
	Patient	Date	Age	Sex	number of drugs	Externals	Drugs (M/L/A/E	Interactions (BNF/ Drugs.com/ Martindale)	Targeted group	Adverse reactions	Clinical medication review
	14	2019-01-02	50	female	2	ventolin 100, duoresp 160/4.5	baclofen10 (6d), mirtazapine30 (1E)	moderate	psychosis
	14	2019-01-03	50	female	2	ventolin 100, duoresp 160/4.5	baclofen10 (6d), mirtazapine30 (1E)	moderate	psychosis
	14	29/3/19	50	female	2	ventolin 100, duoresp 160/4.5	baclofen10 (6d- 2M+2LUNCH+2TEATIME)), mirtazapine30 (1E)	moderate	psychosis
	Patient	Date	Age	Sex	number of drugs	Externals	Drugs (M/L/A/E	Interactions (BNF/ Drugs.com/ Martindale)	Targeted group	Adverse reactions	Clinical medication review
	15	2019-02-02	73	male	7	Sildenafil100, zapain 30/500	candesartan4, gliclazide80 (1M+1E), levothyroxine100 (1M), levothyroxine25 (1M), metformin500 (2M+2A), simvastatin20 (1E), clopidogrel75 (1M)	moderate	cardiovascular, diabetes, hypothyroidism
	Patient	Date	Age	Sex	number of drugs	Externals	Drugs (M/L/A/E	Interactions (BNF/ Drugs.com/ Martindale)	Targeted group	Adverse reactions	Clinical medication review
	19	14/1/2019		female	10	none	amitryptiline25 (1E), bisoprolol2.5 (1M), clopidogrel75 (1M), furosemide40 (1M), glucophage SR500 (1M+1A), lanzoprazole15 (1M), levotryroxine100 (1M), levotryroxine75 (1M), AdcalD3 (1M), pregabalin50 (1M+1A)	moderate	cardiovascular, diabetes, hypothyroidism, depression
	19	2019-09-02		female	8	none	bisoprolol2.5 (1M), clopidogrel75 (1M), furosemide40 (1M), glucophage SR500 (1M+1A), lanzoprazole15 (1M), levotryroxine75 (1M), AdcalD3 (1M), pregabalin50 (1M+1A)	moderate	cardiovascular, diabetes, hypothyroidism, depression
	Patient	Date	Age	Sex	number of drugs	Externals	Drugs (M/L/A/E	Interactions (BNF/ Drugs.com/ Martindale)	Targeted group	Adverse reactions	Clinical medication review
	20	23/2/2019		male	2	Activa leg ulcer hosiery, cetraben cream, warfarin 1 (1d), warfarin3 (1d)	carbimazole5 (3d),simvastatin20 (1E), propranolol (1M+1A)	no interactions	hyperhyroidism, cardiovascular
		2019-01-03		male	3	Activa leg ulcer hosiery, cetraben cream, warfarin 1 (1d), warfarin3 (1d)	carbimazole5 (2d),simvastatin20 (1E), propranolol (1M)		hyperhyroidism, cardiovascular
		2019-07-03		male	2	Activa leg ulcer hosiery, cetraben cream, warfarin 1 (1d), warfarin3 (1d)	carbimazole5 (2d),simvastatin20 (1E)		hyperhyroidism, cardiovascular
	Patient	Date	Age	Sex	number of drugs	Externals	Drugs (M/L/A/E	Interactions (BNF/ Drugs.com/ Martindale)	Targeted group	Adverse reactions	Clinical medication review
	21	13/3/2019	89	female	6	Paracetamol 500	aspirin disp75 (1d, M), bisoprolol10 (1d, M), simvastatin40 (1E), perindopril8 (1d, M), ranitidine150 (1BD, M,A)	moderate
	Patient	Date	Age	Sex	number of drugs	Externals	Drugs (M/L/A/E	Interactions (BNF/ Drugs.com/ Martindale)	Targeted group	Adverse reactions	Clinical medication review
	22	25-03-19	50	male	3	co-codamol 8/500 1-2 qds	propranol80 (1M) , quetiapine25 (1M+2E), sertraline100 (2M)	moderate	Psycosis
	Patient	Date	Age	Sex	number of drugs	Externals	Drugs (M/L/A/E	Interactions (BNF/ Drugs.com/ Martindale)	Targeted group	Adverse reactions	Clinical medication review
	23	2019-04-04	84	female	9	alendronic acid (1W), mobile cassete, novo mix30, ominican needles, paracetamol500, salamol100, simbrinza 10mg/ml, sirdupla 25/125, viscotears, fastclix lancets	lansoprazole15 (1M) glucophage SR500 (1M+1A), FUROSEMIDE40 (1M+1L), clopidogrel75 (1M), levothyroxine75 (1M), AdcalD3 (1M), pregabalin50 (1M+1A), levothyroxine100 (1M), bisoprolol 1.25 (1M)	moderate	diabetes, cardiovascular, low thyroxine, respiratory

## Sheet: Trays 1-19 locations A
		Tray 1		MORN	MID	EVEN	BED		Tray 3		MORN	MID	EVEN	BED
			Simvastatin 20 tabs				1			aspirin disp 75	1
			Tamsulosin MR 400 MCG caps				1			ferrous fumarate210	1	1	1
			Trazodone 50 caps				1			gliclazide80	1
			Clonazepam 2 tabs				0,5			indapamide mr 1.5	1
			Baclofen 10 tabs	1	1	1				metformin500	1	1	1
			Folic acid 5 tabs	1						moxonidine200	1
										simvastatin20			1
										losartan 100	1
		Tray 2		MORN	MID	EVEN	BED		Tray 4		MORN	MID	EVEN	BED
			Ferrous fumarate 210	1						furosemide20	1
			furosemide 40	1						aspirin disp75	1
			aspirin gr 75	1						atorvastatin20			1
			atorvastatin 40				1			bisoprolol 1.25	1
			bisoprolol 2.5	1						Elantan LA50	1
			quinine sulfate 300				1			Gliclazide80	1		1
			isorbide 10	1	1
		Tray 5		MORN	MID	EVEN	BED		Tray 6		MORN	MID	EVEN	BED
			ramipril10	1						colecal400+ca carbonate1.25	1		1
			metformin500	2		2				folic acid5	1
			mirtazapine30				1			lansoprazole25	1
			aspirin75 disp	1						levothyroxine25	1
			atorvastatin40				1			pregabalin50				1
			bisoprolol2.5	1
			monomil xl60	0.5
			amlodipine5	1					Tray 8		MORN	MID	EVEN	BED
			clopidogrel75	1						metformin500	1
										uniphylin cont200	1		1
		Tray 7		MORN	MID	EVEN	BED			angitil sr 120	1			1
			Isosorb mononit 40	1						atorvastatin20
			losartan50	1						calcichew-D3 forte	1		1
			EvacalD3 1500/400	1		1				carbocisteine 375	1		1
			fluoxetine 20	1
			gliclazide40	1					Tray 9		MORN	MID	EVEN	BED
			bumetanide 1	2	1					aspirin75 disp	1
			carvedilol 6.25	1		1				atenolol25	1
			clopidogrel 75	1						levothyroxine25	1
			digoxin 62.5	1						levothyroxine50	1
			pantoprazole gr 40	1						simvastatin20				1
			pravastatin 40				1
			spironolactone 25	0.5	every other day				Tray 11		MORN	MID	EVEN	BED
			tamsulosin mr 400	1						sertraline100	1
			ferrous sulfate 200	1		1				sertraline50	1
										topiramate100	2		2
		Tray 10		MORN	MID	EVEN	BED			aripiprazole5	1
			apixaban5	1		1				lansoprazole15	1
			bisoprolol5	1						levetiracetam750	1		1
			colecalciferol 800u	1						propranolol40	1		1
			isosorbide mono mr 25	1						lacosamide100	1		1
			pravastatin10				1
			mirtazapine15				1
		Tray 12		MORN	MID	EVEN	BED		Tray 13		MORN	MID	EVEN	BED
			isosorbide mono mr25	1						isosorbide mono mr25	1
			atorvastatin20				1			atorvastatin20				1
			bisoprolol2.5	1						bisoprolol2.5	1
			EvacalD3 1500/400	1		1				EvacalD3 1500/400	1		1
			losartan100	1						losartan100	1
			ranitidine150	1		1				ranitidine150	1		1
		Tray 14		MORN	MID	EVEN	BED		Tray 15		MORN	MID	EVEN	BED
			eplerenone25	1						Gliclazide80	1		1
			ramipril10caps			1				isosorbide 20	1		1
			aspirin75 disp tab	1						atorvastatin40				1
			atorvastatin 20	1						bisoprolol2.5	1		1
			carbamazepine 100	1		1	1			ramipril1.25	1		1
			carvedilol25	1		1				ranitide150	1		1
		Tray 16		MORN	MID	EVEN	BED		Tray 17		MORN	MID	EVEN	BED
			FultiumD3 800caps	1					amitriptyline10					1
			gabapentin100	2			2		amlodipine5		1
			lanzoprazole300	1					atorvastatin10					1
			paracetamol500	2	2	2	2		betahistine16		1	1	1
			sertraline100	1					co-careldopa12.5/50		1	1	1
									diazepam2		1	1	1
		Tray 18		MORN	MID	EVEN	BED		gabapentin300		1	1	1
		amlodipine5		1					omeprazole20		1
		apixaban5		1		1			prednisolone5		1
		atorvastatin40					1		prochlorperazine5		1	1	1
									ramipril2.5		1
		bisoprolol1.25		1					tamoxifen20		1
		carbocisteine375		1	1		1
		EvacalD3			2		2
		furosemide40		2					Tray 19		MORN	MID	EVEN	BED
		lanzoprazole30		1					aspirin75 disp		1
		ramipril10					1		atorvastatin80					1
									bisoprolol1.25		1
									clopidogrel75		1
									gliclazide80		2		2
									isosorbide20		1		1
									ramipril2.5		1
									ranitidine150		1			1

## Sheet: trays 20-36 locations A
	Tray 20		MORN	MID	EVEN	BED		Tray 21		MORN	MID	EVEN	BED
	AdcalD3		1					apixaban 5		1			1
	aspirin75 disp		1					atorvastatin 20					1
	lanzoprazole15		1					bisoprolol 1.25					1
	senna7.5					1		digoxin62.5		1
	sertraline50		1					finasteride5		1
								folic acid 5		1
								furosemide40		1
	Tray 22		MORN	MID	EVEN	BED		gatalin xl		1
	amlodipine 10		1					lansoprazole30		1
	atorvastatin 10					1		levothyroxine25		1
	citalopram20		1					ramipril1.25		1			1
	gabapentin100					2		tamsulosin mr 400		1
	metformin500		2		2
	ramipril10		1
								Tray 24		MORN	MID	EVEN	BED
	Tray 23		MORN	MID	EVEN	BED		aspirin gr 75		1
	amitryptiline10					3		furosemide20		1
	atorvastatin 20					1		lanzoprazole30		1
	colecalciferol (vitD3)800u		1					nifedipress mr 20		1		1
	omeprazole20		1					ramipril5		1
	paracetamol500		2	2	2	2
	sertraline50		2
	Tray 25		MORN	MID	EVEN	BED		Tray 26		MORN	MID	EVEN	BED
	donepezil10					1		aspirin 75 disp		1
	folic acid5		1					bisoprolol 2.5		1
	ranitidine 150		1		1			lercanidipine20		1
	slozem 180		1					losartan100		1
	spirinolactone25		half					simvastatin40					1
	allopurinol100		2
	amitriptyline10					2
	atorvastatin10					1		Tray 28		MORN	MID	EVEN	BED
	colecalciferol (vitD3)800u		1					eplerone 25		2
								folic acid 25		1
	Tray 27		MORN	MID	EVEN	BED		isosorbide10		1		1
	adizem xl 180		1					lansoprazole30		1
	clopidogrel 75		1					sitagliptin25		2		2
	fultiumD3-800u		2					tolterodine2		1		1
	furosemide40		2	2				metformin500		2		2
	levothyroxine25		3					ramipril1.25		1
	memantine20		1					aspirin 75 disp		1
	monomax xl 60		1	1				atorvastatin80					1
	pantoprazole gr 40		1					bisoprolol2.5		1
	Tray 29		MORN	MID	EVEN	BED		Tray 30		MORN	MID	EVEN	BED
	risperidone0.5					1		simvastatin20					1
	ranitidine150		1		1			tamsulosin mr 400					1
	Evacal		1		1			trazodone50					1
								clonazepam2					half
	Tray 31		MORN	MID	EVEN	BED		baclofen10		1	1	1
	aspirin gr 75		1					folic acid5		1
	atorvastatin 40					1
	lanzoprazole30		1					Tray 32		MORN	MID	EVEN	BED
	metformin mr 500		1		1			ramipril10		1
	tildiem retard90		1		1			citalopram10		1
	levothyroxine 50		1					memantine20		1
								metformin500		2		2
	Tray 33		MORN	MID	EVEN	BED		atorvastatin40					1
	isosorbide mr40		1
	losartan50		1					Tray 34		MORN	MID	EVEN	BED
	Evacal		1		1			sertraline100		1
	fluoxetine20		1					sertraline50		1
	gliclazide40		1					topiramate100		2		2
	bumetanide1		2	1				aripiprazole5		1
	carvedilol 6.25		1		1			lansoprazole15		1
	clopidogrel 75		1					levetiracetam750		1		1
	digoxin 62.5		1					propranolol50		1		1
	pantoprazole gr 40		1					lacosamide100		1		1
	pravastatin40					1
	spirinolactone25		1					Tray 36		MORN	MID	EVEN	BED
	tamsulosinmr 40		1					coracten sr 10		1
	ferrous sulfate 200		1		1			ranitidine 150		1		1
								Epilim Chrono 300		1
	Tray 35		MORN	MID	EVEN	BED		fluoxetine 20		1
	amlodipine10		1					hydroxycloroquine 200		1
	atorvastatin10					1		risperidone 0.5			1		1
	metformin500		2		2			epilim Chrono 500		1
	ramipril1.25					1

## Sheet: Trays 37- locations A
		Tray 37		MORN	MID	EVEN	BED
		aripiprazole 30		1
		olanzapine 2.5		1		1
		pantoprazole 20 gr				1
		sertraline 100		1
		sertraline 50		1
	Tray 38		MORN	MID	EVEN	BED		Tray 39		MORN	MID	EVEN	BED
	amytriptiline 10					1		sertraline50		1
	metformin 500		2		2			simvastatin40				1
	ferrous fumarate 210		1	1	1			aspirin 75 disp		1
	simvastatin 40				1			colecalciferol400			1
	omeprazole 20		1					folic acid 5			1
	gabapentin 100		1		1			furosemide20			1
								ramipril 1.25			1
	Tray 40		MORN	MID	EVEN	BED		Tray 41		MORN	MID	EVEN	BED
	candesartan4		1					Ramipril 1.2		1
	doxazosin2		1					furosemide 20		1
	folic acid5		1					metformin MR 1g		1
	furosemide20		1					Atorvastatin 10					1
								Zopiclone 7.5					1
	Tray 42		MORN	MID	EVEN	BED		duloxetine 60 gr		1
	Apixaban 5		1		1
	isosorbide mono 20		1		1			Tray 43		MORN	MID	EVEN	BED
	atorvastatin 20				1			apixaban5		1		1
	levetiracetam 250		1		1			atorvastatin10				1
	carbocisteine375		2	3	3			bisoprolol1.25		1		1
	ranitidine150		1		1
	furosemide40		1
	ceterizine10		1					Tray 44		MORN	MID	EVEN	BED
	hydrocortisone10		1					doxazosin4		2		2
	verapamil240 mr		half		half			felodipine10 mr		1		1
								lansoprazole30 gr		1
	Tray 45		MORN	MID	EVEN	BED		simvastatin20				1
	atorvastatin20				1			telmisartan40		1
	longtec20		1		1
	citalopram20		2					Tray 46		MORN	MID	EVEN	BED
	longtec5		1		1			methylphenidate5		1	1	1
	gabapentin300		2	2	2			sertraline50		1
	hyoscine butyl10		2	2	2	2		methylphenidate20		1	1	1
	omeprazole20		1		1			sertraline100		1
								aripiprazole10		1
								ranitidine150		1		1
	Tray 47		MORN	MID	EVEN	BED
	amitryptiline10					1		Tray 48		MORN	MID	EVEN	BED
	aspirin75disp		1					Rivaroxaban20		1
	atorvastatin20		1					clopidogrel75		1
	azithromycin250		1					cyclizine50		1			1
	bisoprolol7.5		1					lanzoprazole30		1
	furosemide40		1					zopiclone3.75					1
	gliclazide80		1					carvedilol6.25		1			1
	lamotrigine100		1					furosemide40		1
	lamotrigine200		1					ferrous sulfate200		1	1		1
	monomil xl60		1
	omeprazole20		1
	sitagliptin25		1					Tray 49		MORN	MID	EVEN	BED
	tegretol pr 200		1			1		amlodipine5		1
								aspirin 75 disp		1
	Tray 50		MORN	MID	EVEN	BED		bisoprolol 5		1
	amitryptiline 50					1		ramipril 10		1
	lansoprazole 15 gr caps		1					rosuvastatin 20				1
	naproxen 500		1		1			tamsulosin 100		1
	pregabalin 300		1			1		thiamine 100		1			1
								vitamin B strong tablets		2	2	2
	Tray 51		MORN	MID	EVEN	BED		Tray 52		MORN	MID	EVEN	BED
	aspirin75 disp		1					pregabalin75		1			1
	celiprolol200		2					clopidogrel75		1
	dosulepin25					1		levothyroxine100		1
	omeprazole40 gr tabs		1					ferrous fumarate210		1		1
	simvastatin40					1		simvastatin20					1
	betahistine16		1
	Tray 53		MORN	MID	EVEN	BED		Tray 54		MORN	MID	EVEN	BED
	adalat LA60		1					amlodipine10		1
	FultiumD3 800		1					atenolol25		1
	atorvastatin 40					1		atorvastatin10					1
	clopidogrel75		1					clopidogrel75		1
								lanzoprazole30		1
								metformin500		2		2
	Tray 55		MORN	MID	EVEN	BED
	Amiodarone 200		1					Tray 56		MORN	MID	EVEN	BED
	clopidogrel75		1					lansprazole 15		1
	digoxin62.5				1			levothyroxine100		1
	lansoprazole30		1					levothyroxine25		1
	mesalazine ec 400gr		2	2		2		naproxen500		1
	rivaroxaban20		1					venlafaxine mr 225		1
	tamsulosin mr 400		1					venlafaxine 75				1
	trimethoprim 100					1		zopiclone 7.5					1
	co-beneldopa 50/200		1	1	1
	ropinirole 5		1	1	1			Tray 57		MORN	MID	EVEN	BED
								allopurinol300					1
								amlodipine5					2
	Tray 58		MORN	MID	EVEN	BED		atenolol25					1
	concerta xl 18							atorvastatin20					1
	concerta xl 36							loperamide2		1	1		1
	quetiapine 100							mesalazine gr 800 gr		1	1		1
	sertraline 100							omeparzole 20		1			1
	nifedipine100							ramipril 10					1
	duloxetine30 gr caps							metformin 500		2			2
	duloxetine 60 gr caps
								Tray 59		MORN	MID	EVEN	BED
								folic acid5
								fluoxetine40
								mebeverine135
								montekulast10
								colecalciferol800unit

## Sheet: Location C
Patient no.		Date	Age	Sex	number of drugs	Externals	Drugs (M/L/A/E)	Interactions (BNF/ Drugs.com/ Martindale)	Targeted group	Adverse reactions	Clinical medication review
1		2019-05-28	87	female	8	no externals	Amitriptyline 10, atenolol 25, gliclazide 30 mr, glucophage sr 500, lanzoprazole 30 gr, lercanidipine 10, perindopril 4, prednisolone 5	moderate	diabetes, BP, abdominal pain/ disconfort
2		2019-05-28	50	female	8	movicol, dyhidrocodeine 30 (2, 4x/day), salbutamol 100	aspirin75 disp, ferrous sulphate 200, gabapentin 300, lansoprazole 15 gr, levothyroxine 100, mirtazapine 45, pizotifen 1.5, thiamine 100	moderate	depression, migraine
3		2019-05-28	48	female	10	buprenorphine tabs 200mcg (3tds+3N), methylphenidate 5 (1bd)	Prometazine 25, topiramate 600, zolpidem 10, duloxetine 60 gr, alzain 300, cloral betaine 707, flupentixol 1, haloperidol 5, lanzoprazole 30, lorazepam 1	haloperidol - topiramate	depression,schizophrenia, seizures, insonmia
4		2019-05-28	81	female	7	no externals	Amitriptyline 10, apixaban 5, atorvastatin40, furosemide 20, lercanidipine 10, levetiracetam 250, ramipril 10	moderate	cardiovascular
5		2019-05-28	50	female	9	Dihydrocodeine 30 (2 qds), movicol, salbutamol 5mg/2ml	aspirin75 disp, ferrous sulfate 200, gabapentin300, lansoprazole15, levothyroxine100, levothyroxine50, mirtazapine45, pizotifen1.5, thiamine100	moderate	depression, migraine
6		2019-05-28	52	female	7	diazepam10,pericyazine2.5	atorvastatin80, cetirizine10, lamotrigine100, levothyroxine75, promethazine25, sertraline100, zopiclone75,	moderate	anxiety, high cholesterol
7		2019-05-28	82	male	11	no externals	aspirin75 disp, atenolol50, candesartan8,dihydrocodeine30, ezetimibe10,furosemide40, lansoprazole30, paroxetine20, pregabalin100, zolpidem5	moderate	BP, CV, depression,
8		2019-05-28	89	male	12	no externals	see tray	allopurinol – perindopril/ amLODIPine - simvastatin	CV, diabetes,
9		2019-05-28	78	male	9	Amytriptiline 10 (1 bed when needed)	aspirin75 disp, atenolol100, candesartan4,codeine30, furosemide20, omeprazole20, paracetamol500, simvastatin20, tamsulosin mr400	moderate	CV, pain, prostate hyperplasia
10		2019-05-28	87	female	8	no externals	Amytriptiline 10, atenolol25,gliclazide mr30, glucophage sr 500, lansoprazole30, lercadinipine30, perindopril4, prednisolone5	moderate	BP, diabetes, neuropatic pain,
11		2019-06-10	89	female	8	no externals	Aspirin 75 disp, atenolol50, citalopram10, lanzoprazole15, levothyroxine100, metformin500, simvastatin20, zopiclone7.5	lansoprazole- citalopram	diabetes, depression, hypothyroidism
12		2019-06-10	63	male	6	docusate sodium100(2BD), paracetamol500(2QDS), quinine sulfate200 (1N), sodium valproate500 (3N), zomorph10 (1 every 12h)	amlodipine10, apixaban5, furosemide40, levetiracetam500, pregabalin75, ranitidine150	moderate	cardiovascular/epilepsy
13		2019-06-10	90	female	9	no externals	amlodipine5, apixaban2.5, bisoprolol1.25, citalopram10, co-codamol8/500, furosemide40,gliclazide mr30, lorazepam 1, prednisolone 5	codeine - LORazepam	cardiovascular, diabetes
14		2019-06-10	79	female	5	no externals	alendronic acid70, amalodipine10, prednisolone1, prednisolone5, simvastatin20	amLODIPine – simvastatin aqui
15		2019-06-10	81	female	6	no externals	Amytryptiline10, apixaban5, atoravastatin40,furoemide20, lercanidipine10, levetiracetam250, ramipril10
16		2019-06-10	70	male	7	sodium valproate gr ec 500(1M+1E)	aspirin75disp, atorvastatin10, clopidogrel75, lanzoprazole30, levetiracetam250, levetiracetam500,
17		2019-06-11	85	female	9	no externals	Bisoprolol2.5, clopidogrel75, folic acid5, hydrocortisone10, levothyroxine100, omeprazole20, prednisolone1, prednisolone5, senna7.5
18		2019-06-11	42	male	7	no externals	Bisoprolol2.5, candesartan16, citalopram20, furosemide40, lanzoprazole30, simvastatin40, spironolactone25
19		2019-06-11	75	female	6	no externals	amlodipine5, fexofenadine180, furosemide20, lanzoprazole15, losartan50, mirtazapine30
20		2019-06-11	85	female	5	no externals	atorvastatin10, bendroflumethazine2.5, felodipine mr 2.5, levothyroxine75, lisinopril10
21		2019-06-11	57	female	9	no externals	bisoprolol5, celecoxib100, esomeprazole20, furosemide40, lisinopril5, loratadine10, metformin500, pregabalin100, simvastatin20
22		2019-06-11	32	male	9	no externals	carbamazepine400, citalopram20, clopixol2, ferrous fumarate210, fexofenadine180, kemadrin5, lanzoprazole15, melatonin3, naproxen500
23		2019-06-12	73	male	11	no externals	see tray
24		2019-06-12	61	male	7	no externals	amitriptyline 10, atorvastatin10, citalopram10, donepezil10, levothyroxine100, toltetorodine1, trimetropim100
25		2019-06-12	73	female	3	no externals	alzain50, ramipril5, sertraline100
26		2019-06-12	51	female	10	paracetamol 500	see tray
27		2019-06-12	85	male	6	no externals	hydrocortisone10, levothyroxine25, paracetamol500, perindopril2, phenytoin 100, tamsulosin mr 400

## Sheet: Location C  trays
	Patient 1					Patient 2
	M	Mid	E	Bed		M	Mid	E	Bed
Amitriptyline 10			1		aspirin75 disp	1
atenolol 25	1				ferrous sulphate 200	1		1
gliclazide 30 mr	1		1		gabapentin 300	1	1		1
lanzoprazole 30 gr	1				lansoprazole 15 gr		1
lercanidipine 10	1				levothyroxine 100,	1
perindopril 4	1				Pizotifen 1.5				1
prednisolone 5		1			thiamine 100	1
glucophage sr 500,	2	2			Mirtazapine 45			1
	Patient 3					Patient 4 (Dossette box Tabtime carrousel)
	M	Mid	E	Bed		M	Mid	E	Bed
Prometazine 25	2				Amitriptyline 10			1
topiramate 600	1			1	Apixaban 5	1		1
Zolpidem 10				1	atorvastatin40			1
duloxetine 60 gr	1				Furosemide 20	1
Alzain 300	1			1	Lercanidipine 10	1
cloral betaine 707				3	levetiracetam 250	1		1
Flupentixol 1	1	1	1		ramipril 10	1
Haloperidol 5	1			1
lanzoprazole 30	1
lorazepam 1	1	1	1
	Patient 5					Patient 6
	M	Mid	E	Bed		M	Mid	E	Bed
aspirin75 disp,					atorvastatin80,				1
ferrous sulfate 200,					cetirizine10,	1
gabapentin300,					lamotrigine100,	1		1
lansoprazole15,					levothyroxine75	1
levothyroxine100,					promethazine25,				2
levothyroxine50,					sertraline100,	2
mirtazapine45,					zopiclone75,				1
pizotifen1.5,
thiamine100
	Patient 7					Patient 8
	M	Mid	E	Bed		M	Mid	E	Bed
aspirin75 disp,	1				Allopurinol 300	1
atenolol50,	1				Amlodipine 10	1
candesartan8,	1				Aspirin 75 disp	1
dihydrocodeine30,	1		1		Bendroflumetiazide2.5	1
ezetimibe10,		1			gliclazide40	1
furosemide40,	1				levothyroxine100	1
lansoprazole30,	1				levothyroxine75	1
paroxetine20,	1				linagliptin5	1
pregabalin100,	1	1	1	1	metformin500	2
zolpidem5				2	perindopril4	1
					simvastatin20				1
					tamsulosin mr 400	1
	Patient 9					Patient 10
	M	Mid	E	Bed		M	Mid	E	Bed
aspirin75 disp,	1				Amytriptiline 10,				1
atenolol100,	1				atenolol25,	1
candesartan4,	1				gliclazide mr30,	1		1
codeine30,	1	1	1	1	glucophage sr 500,		2		2
furosemide20,	1				lansoprazole30,	1
omeprazole20,	1				lercadinipine30,	1
paracetamol500,	2	2	2	2	perindopril4,				1
simvastatin20,				1	prednisolone5		1
tamsulosin mr400	1
	Patient 11					Patient 12
	M	Mid	E	Bed		M	Mid	E	Bed
Aspirin 75 disp	1				amlodipine10
atenolol50	1				apixaban5
citalopram10	1				furosemide40
lanzoprazole15		1			levetiracetam500
levothyroxine100	1				pregabalin75
metformin500	1		1		ranitidine150
simvastatin20				1
Zopiclone7.5				2
	Patient 13					Patient 14
	M	Mid	E	Bed		M	Mid	E	Bed
amlodipine5	1				alendronic acid70	tue
apixaban2.5	1		1		amalodipine10,	1
bisoprolol1.25	1				prednisolone1,		4
citalopram10	1				prednisolone5,		2
co-codamol8/500	2	2	2	2	simvastatin20				1
furosemide40,	1	1	1
gliclazide mr30				1
lorazepam 1,
prednisolone 5	1
	Patient 15	dossette tabtime				Patient 16
	M	Mid	E	Bed		M	Mid	E	Bed
Amytryptiline10			1		aspirin75disp,	1
apixaban5,	1		1		atorvastatin10,				1
atoravastatin40,			1		clopidogrel75,	1
furoemide20,	1				lanzoprazole30,	1
lercanidipine10,	1				levetiracetam250,	1		1
levetiracetam250	1		1		levetiracetam500,	1		1
ramipril10	1
	Patient 17					Patient 18
	M	Mid	E	Bed		M	Mid	E	Bed
Bisoprolol2.5,	1				Bisoprolol2.5,	1			1
clopidogrel75,	1				candesartan16,	1
folic acid5,	1				citalopram20,	2
hydrocortisone10,	1	0.5	0.5		furosemide40,	1
levothyroxine100,	1				lanzoprazole30,	1
omeprazole20,		1			simvastatin40,				1
prednisolone1,	3				spironolactone25	1
prednisolone5,	1
senna7.5				2
	Patient 19					Patient 20
	M	Mid	E	Bed		M	Mid	E	Bed
amlodipine5,	1				atorvastatin10,				1
fexofenadine180,	1				bendroflumethazine2.5,	1
furosemide20,	1				felodipine mr 2.5,	1
lanzoprazole15,	1				levothyroxine75,	1
mirtazapine30				1	lisinopril10	1
				1
	Patient 21					Patient 22
	M	Mid	E	Bed		M	Mid	E	Bed
bisoprolol5,	1				carbamazepine400,	1			1
celecoxib100,	1		1		citalopram20,	1
esomeprazole20,	1				clopixol2	4	4		4
furosemide40,	1				ferrous fumarate210,	1
lisinopril5,				1	fexofenadine180,	1
loratadine10,	1				kemadrin5,	1	1		1
metformin500,	2		2		lanzoprazole15,	1
pregabalin100,	1		1		melatonin3,				1
simvastatin20				1	naproxen500	1		1
	Patient 23					Patient 24
	M	Mid	E	Bed		M	Mid	E	Bed
atorvastatin80					amitriptyline 10,				1
bisoprolol1.25				1	atorvastatin10,	1
Duloxetine 20 gr	1				citalopram10	1
edoxaban30	1			1	donepezil10,	1
metoclopramine10	1				levothyroxine100,	1
mirabegron mr 50	1				toltetorodine1,	1			1
omeprazole40	1			1	trimetropim100				1
Perindopril 2	1
ranitidine300				1
senna7.5				2
tamsulosin mr 400	1
						Patient 26
	Patient 25					M	Mid	E	Bed
	M	Mid	E	Bed	clopidogrel75	1
alzain50,	1			1	ferrous fumarate210	1
ramipril5,				1	folic acid5	1
sertraline100	1				lanzoprazole30,				1
					levothyroxine50	1
					lisinopril5	1
					olanzapine5				1
					simvastatin40				1
					valproic acid 250	1			1
	Patient 27
	M	Mid	E	Bed
hydrocortisone10	1	0.5	0.5
levothyroxine25,	1
paracetamol500,	2			2
perindopril2,				1
phenytoin 100,	1			1
tamsulosin mr 400	1
